# Supplementary material for: Increased Aggregation Is More Frequently Associated to Human Disease-Associated Mutations Than to Neutral Polymorphisms
Source: PubMed Central journal article supplement (PMC4560525; doi:10.1371/journal.pcbi.1004374), 2015-09-04
Supplement: pcbi.1004374.s001.pdf [file pcbi.1004374.s001.pdf]

| UniProt ID | Protein Name                  | Protein itself aggregates                                       | Homologous protein aggregate                                                  | Involved in aggregation pathology        | Reference |
|------------|-------------------------------|-----------------------------------------------------------------|-------------------------------------------------------------------------------|------------------------------------------|-----------|
| ALBU_HUMAN | Serum albumin                 |                                                                 | Bovine Serum Albumin                                                          |                                          | [44]      |
| HBB_HUMAN  | Hemoglobin subunit beta       | in vitro evidence                                               |                                                                               |                                          | [45]      |
| HBA_HUMAN  | Hemoglobin subunit alpha      | in vitro evidence                                               |                                                                               |                                          | [45]      |
| ANT3_HUMAN | Antithrombin-III              |                                                                 |                                                                               | Shows reduced activity in AL amyloidosis | [46]      |
| ACTG_HUMAN | Actin, cytoplasmic 2          | Component of amyloid deposit of localized cutaneous amyloidosis |                                                                               |                                          | [47]      |
| IC1_HUMAN  | Serpin G1                     |                                                                 | The entire serpin family is known to be aggregation prone via domain swapping |                                          | [48]      |
| LDHB_HUMAN | Lactate dehydrogenase         |                                                                 | Homolog from rabbit aggregates                                                |                                          | [49]      |
| HBG2_HUMAN | Hemoglobin subunit gamma-2    | in vitro evidence                                               |                                                                               |                                          | [45]      |
| ACTC_HUMAN | Actin, alpha cardiac muscle 1 | in vitro evidence                                               |                                                                               |                                          | [50]      |
| ACTS_HUMAN | Actin, alpha skeletal muscle  | in vitro evidence                                               |                                                                               |                                          | [50]      |
| G6PI_HUMAN | Glucose-6-phosphate isomerase |                                                                 | The homolog from yeast aggregates during refolding in vitro                   |                                          | [51]      |

|             |                                                             |                   |                                                                               |  |      |
|-------------|-------------------------------------------------------------|-------------------|-------------------------------------------------------------------------------|--|------|
| THBG_HUMAN  | Serpin A7                                                   |                   | The entire serpin family is known to be aggregation prone via domain swapping |  | [48] |
| NB5R3_HUMAN | NADH-cytochrome b5 reductase 3                              |                   |                                                                               |  |      |
| RAC2_HUMAN  | Ras-related C3 botulinum toxin substrate 2                  |                   |                                                                               |  |      |
| CAH2_HUMAN  | Carbonic anhydrase 2                                        | in vitro evidence |                                                                               |  | [52] |
| GDIA_HUMAN  | Rab GDP dissociation inhibitor alpha                        |                   |                                                                               |  |      |
| PUR9_HUMAN  | Bifunctional purine biosynthesis protein PURH               |                   |                                                                               |  |      |
| THIL_HUMAN  | Acetyl-CoA acetyltransferase, mitochondrial                 | in vitro evidence |                                                                               |  | [53] |
| PROC_HUMAN  | Vitamin K-dependent protein C                               |                   |                                                                               |  |      |
| CP19A_HUMAN | Aromatase                                                   |                   |                                                                               |  |      |
| CHLE_HUMAN  | Cholinesterase                                              |                   |                                                                               |  |      |
| OAT_HUMAN   | Ornithine aminotransferase, mitochondrial                   | in vitro evidence |                                                                               |  | [54] |
| ACADM_HUMAN | Medium-chain specific acyl-CoA dehydrogenase, mitochondrial | in vitro evidence |                                                                               |  | [55] |

|             |                                                    |                   |  |                            |      |
|-------------|----------------------------------------------------|-------------------|--|----------------------------|------|
| KPYR_HUMAN  | Pyruvate kinase PKLR                               |                   |  |                            |      |
| GSHB_HUMAN  | Glutathione synthetase                             |                   |  |                            |      |
| IGLL1_HUMAN | Immunoglobulin lambda-like polypeptide 1           |                   |  | Light Chain Amyloidosis    |      |
| STAT3_HUMAN | Signal transducer and activator of transcription 3 |                   |  | Involved in Abeta toxicity |      |
| PUR8_HUMAN  | Adenylosuccinate lyase                             | in vitro evidence |  |                            | [56] |
| RASH_HUMAN  | GTPase HRas                                        |                   |  |                            |      |
| ASSY_HUMAN  | Argininosuccinate synthase                         |                   |  |                            |      |
| HEMH_HUMAN  | Ferrochelatase, mitochondrial                      | in vitro evidence |  |                            | [57] |
| RASN_HUMAN  | GTPase NRas                                        |                   |  |                            |      |
| SH21A_HUMAN | SH2 domain-containing protein 1A                   |                   |  |                            |      |
| ATLA1_HUMAN | Atlastin-1                                         | in vitro evidence |  |                            | [58] |
| P53_HUMAN   | Cellular tumor antigen p53                         | in vitro evidence |  |                            | [4]  |
| ARG11_HUMAN | Arginase-1                                         |                   |  |                            |      |

|             |                                                             |                   |  |                      |      |
|-------------|-------------------------------------------------------------|-------------------|--|----------------------|------|
| STS_HUMAN   | Steryl-sulfatase                                            |                   |  |                      |      |
| MSH2_HUMAN  | DNA mismatch repair protein Msh2                            |                   |  |                      |      |
| HEXA_HUMAN  | Beta-hexosaminidase subunit alpha                           | in vitro evidence |  | Tay–Sachs disease    | [59] |
| MSH6_HUMAN  | DNA mismatch repair protein Msh6                            |                   |  |                      |      |
| SCO1_HUMAN  | Protein SCO1 homolog, mitochondrial                         |                   |  |                      |      |
| CASQ2_HUMAN | Calsequestrin-2                                             | in vitro evidence |  |                      | [60] |
| ODBA_HUMAN  | 2-oxoisovalerate dehydrogenase subunit alpha, mitochondrial |                   |  |                      |      |
| XRP2_HUMAN  | Protein XRP2                                                |                   |  | Retinitis pigmentosa |      |
| GCDH_HUMAN  | Glutaryl-CoA dehydrogenase, mitochondrial                   | in vitro evidence |  |                      | [61] |
| RNH2B_HUMAN | Ribonuclease H2 subunit B                                   |                   |  |                      |      |
| PMM2_HUMAN  | Phosphomannomutase 2                                        | in vitro evidence |  |                      | [62] |
| MUTA_HUMAN  | Methylmalonyl-CoA mutase, mitochondrial                     |                   |  |                      |      |

|             |                                               |                   |                                                            |                                            |      |
|-------------|-----------------------------------------------|-------------------|------------------------------------------------------------|--------------------------------------------|------|
| HGD_HUMAN   | Homogentisate 1,2-dioxygenase                 |                   |                                                            | Alkaptonuria, novel type II AA amyloidosis |      |
| SPYA_HUMAN  | Serine-pyruvate aminotransferase              | in vitro evidence |                                                            |                                            | [63] |
| GLCM_HUMAN  | Glucosylceramidase                            |                   |                                                            |                                            |      |
| UNG_HUMAN   | Uracil-DNA glycosylase                        |                   | Poxvirus-encoded uracil DNA glycosylase shown to aggregate |                                            | [64] |
| JAK3_HUMAN  | Tyrosine-protein kinase JAK3                  |                   |                                                            |                                            |      |
| TY3H_HUMAN  | Tyrosine 3-monooxygenase                      |                   |                                                            |                                            |      |
| METK1_HUMAN | S-adenosylmethionine synthase isoform type-1  |                   |                                                            |                                            |      |
| ARSB_HUMAN  | Arylsulfatase B                               |                   |                                                            |                                            |      |
| BGLR_HUMAN  | Beta-glucuronidase                            |                   |                                                            |                                            |      |
| OTC_HUMAN   | Ornithine carbamoyltransferase, mitochondrial |                   |                                                            |                                            |      |
| SOS1_HUMAN  | Son of sevenless homolog 1                    |                   |                                                            |                                            |      |
| ARL6_HUMAN  | ADP-ribosylation factor-like protein 6        |                   |                                                            |                                            |      |

|             |                                         |                                                         |  |                                                     |      |
|-------------|-----------------------------------------|---------------------------------------------------------|--|-----------------------------------------------------|------|
| KHK_HUMAN   | Ketohexokinase                          |                                                         |  |                                                     |      |
| SUIS_HUMAN  | Sucrase-isomaltase, intestinal          | in vitro evidence                                       |  |                                                     | [65] |
| TGFR1_HUMAN | TGF-beta receptor type-1                |                                                         |  |                                                     |      |
| CXB2_HUMAN  | Gap junction beta-2 protein             |                                                         |  |                                                     |      |
| INSR_HUMAN  | Insulin receptor                        | in vitro evidence                                       |  |                                                     | [66] |
| FA8_HUMAN   | Coagulation factor VIII                 | in vitro evidence                                       |  |                                                     | [67] |
| CAH4_HUMAN  | Carbonic anhydrase 4                    |                                                         |  |                                                     |      |
| SUMF1_HUMAN | Sulfatase-modifying factor 1            |                                                         |  |                                                     |      |
| ATTY_HUMAN  | Tyrosine aminotransferase               |                                                         |  |                                                     |      |
| NEUS_HUMAN  | Neuroserpin                             | Neuroserpin inclusion bodies in Familial encephalopathy |  |                                                     | [68] |
| CD40L_HUMAN | CD40 ligand                             |                                                         |  | CD40-CD40L interaction associated with AD pathology | [69] |
| PTPS_HUMAN  | 6-pyruvoyl tetrahydrobiopterin synthase |                                                         |  |                                                     |      |

|             |                                      |                   |  |  |      |
|-------------|--------------------------------------|-------------------|--|--|------|
| CHK2_HUMAN  | Serine/threonine-protein kinase Chk2 |                   |  |  |      |
| ACY2_HUMAN  | Aspartoacylase                       | in vitro evidence |  |  | [70] |
| TTPA_HUMAN  | Alpha-tocopherol transfer protein    | in vitro evidence |  |  | [71] |
| CLAT_HUMAN  | Choline O-acetyltransferase          | in vitro evidence |  |  | [72] |
| RLBP1_HUMAN | Retinaldehyde-binding protein 1      |                   |  |  |      |
| RPE65_HUMAN | Retinoid isomerohydrolase            |                   |  |  |      |
| CP2R1_HUMAN | Vitamin D 25-hydroxylase             |                   |  |  |      |

**References:**

4. Xu J, Reumers J, Couceiro JR, De Smet F, Gallardo R, et al. (2011) Gain of function of mutant p53 by coaggregation with multiple tumor suppressors. *Nat Chem Biol* 7: 285-295.
44. Holm NK, Jespersen SK, Thomassen LV, Wolff TY, Sehgal P, et al. (2007) Aggregation and fibrillation of bovine serum albumin. *Biochim Biophys Acta* 1774: 1128-1138.
45. McGovern P, Reisberg P, Olson JS (1976) Aggregation of deoxyhemoglobin subunits. *J Biol Chem* 251: 7871-7879.
46. Gamba G, Montani N, Anesi E, Palladini G, Lorenzutti F, et al. (1999) Abnormalities in thrombin-antithrombin pathway in AL amyloidosis. *Amyloid* 6: 273-277.
47. Miura Y, Harumiya S, Ono K, Fujimoto E, Akiyama M, et al. (2013) Galectin-7 and actin are components of amyloid deposit of localized cutaneous amyloidosis. *Exp Dermatol* 22: 36-40.
48. Huntington JA, Sendall TJ, Yamasaki M (2009) New insight into serpin polymerization and aggregation. *Prion* 3: 12-14.

49. Goyal K, Walton LJ, Tunnacliffe A (2005) LEA proteins prevent protein aggregation due to water stress. *Biochem J* 388: 151-157.
50. Mazhul VM, Zaitseva EM, Shavlovskii MM, Povarova OI, Kuznetsova IM, et al. (2005) [Room temperature phosphorescence of amorphous aggregates and amyloid fibrils resulting from protein misfolding]. *Tsitologiya* 47: 978-987.
51. Li J, Zhang S, Wang C (2001) Effects of macromolecular crowding on the refolding of glucose- 6-phosphate dehydrogenase and protein disulfide isomerase. *J Biol Chem* 276: 34396-34401.
52. Wetlaufer DB, Xie Y (1995) Control of aggregation in protein refolding: a variety of surfactants promote renaturation of carbonic anhydrase II. *Protein Sci* 4: 1535-1543.
53. Miyazaki A, Sakashita N, Lee O, Takahashi K, Horiuchi S, et al. (1998) Expression of ACAT-1 protein in human atherosclerotic lesions and cultured human monocytes-macrophages. *Arterioscler Thromb Vasc Biol* 18: 1568-1574.
54. Boernke WE, Stevens FJ, Peraino C (1981) Effects of self-association of ornithine aminotransferase on its physicochemical characteristics. *Biochemistry* 20: 115-121.
55. Jank JM, Maier EM, Reibeta DD, Haslbeck M, Kemter KF, et al. (2014) The domain-specific and temperature-dependent protein misfolding phenotype of variant medium-chain acyl-CoA dehydrogenase. *PLoS One* 9: e93852.
56. Sivendran S, Patterson D, Spiegel E, McGown I, Cowley D, et al. (2004) Two novel mutant human adenylosuccinate lyases (ASLs) associated with autism and characterization of the equivalent mutant *Bacillus subtilis* ASL. *J Biol Chem* 279: 53789-53797.
57. Najahi-Missaoui W, Dailey HA (2005) Production and characterization of erythropoietic protoporphyrin heterodimeric ferrochelatases. *Blood* 106: 1098-1104.
58. Zhao J, Hedera P (2013) Hereditary spastic paraplegia-causing mutations in atlastin-1 interfere with BMPRII trafficking. *Mol Cell Neurosci* 52: 87-96.
59. Weitz G, Proia RL (1992) Analysis of the glycosylation and phosphorylation of the alpha-subunit of the lysosomal enzyme, beta-hexosaminidase A, by site-directed mutagenesis. *J Biol Chem* 267: 10039-10044.
60. He Z, Dunker AK, Wesson CR, Trumble WR (1993) Ca(2+)-induced folding and aggregation of skeletal muscle sarcoplasmic reticulum calsequestrin. The involvement of the trifluoperazine-binding site. *J Biol Chem* 268: 24635-24641.
61. Westover JB, Goodman SI, Frerman FE (2003) Pathogenic mutations in the carboxyl-terminal domain of glutaryl-CoA dehydrogenase: effects on catalytic activity and the stability of the tetramer. *Mol Genet Metab* 79: 245-256.
62. Vega AI, Perez-Cerda C, Abia D, Gamez A, Briones P, et al. (2011) Expression analysis revealing destabilizing mutations in phosphomannomutase 2 deficiency (PMM2-CDG): expression analysis of PMM2-CDG mutations. *J Inher Metab Dis* 34: 929-939.
63. Santana A, Salido E, Torres A, Shapiro LJ (2003) Primary hyperoxaluria type 1 in the Canary Islands: a conformational disease due to I244T mutation in the P11L-containing alanine:glyoxylate aminotransferase. *Proc Natl Acad Sci U S A* 100: 7277-7282.



64. Stuart DT, Upton C, Higman MA, Niles EG, McFadden G (1993) A poxvirus-encoded uracil DNA glycosylase is essential for virus viability. *J Virol* 67: 2503-2512.
65. Sigrist H, Ronner P, Semenza G (1975) A hydrophobic form of the small-intestinal sucrase-isomaltase complex. *Biochim Biophys Acta* 406: 433-446.
66. Kohanski RA (1989) Insulin receptor aggregation and autophosphorylation in the presence of cationic polyamino acids. *J Biol Chem* 264: 20984-20991.
67. Tagliavacca L, Wang Q, Kaufman RJ (2000) ATP-dependent dissociation of non-disulfide-linked aggregates of coagulation factor VIII is a rate-limiting step for secretion. *Biochemistry* 39: 1973-1981.
68. Ying Z, Wang H, Fan H, Wang G (2011) The endoplasmic reticulum (ER)-associated degradation system regulates aggregation and degradation of mutant neuroserpin. *J Biol Chem* 286: 20835-20844.
69. Tan J, Town T, Crawford F, Mori T, DelleDonne A, et al. (2002) Role of CD40 ligand in amyloidosis in transgenic Alzheimer's mice. *Nat Neurosci* 5: 1288-1293.
70. Le Coq J, An HJ, Lebrilla C, Viola RE (2006) Characterization of human aspartoacylase: the brain enzyme responsible for Canavan disease. *Biochemistry* 45: 5878-5884.
71. Min KC, Kovall RA, Hendrickson WA (2003) Crystal structure of human alpha-tocopherol transfer protein bound to its ligand: implications for ataxia with vitamin E deficiency. *Proc Natl Acad Sci U S A* 100: 14713-14718.
72. Froissart C, Basset P, Mandel P, Massarelli R (1979) Choline acetyltransferase aggregates from human placenta and rat brain. *FEBS Lett* 100: 276-280.
